# Supplementary material
Source: ML conference proceedings conference paper supplement (https://proceedings.neurips.cc/paper_files/paper/2022/hash/f88709551258331f9ab31b33c71021a4-Abstract.html)
Supplement: Supplementary file 1 [file f88709551258331f9ab31b33c71021a4-Supplemental-Datasets_and_Benchmarks.zip]

Archive with 3 entries (3 files):
- Appendix.pdf
- AuthorStatement.pdf
- DatasheetForDatasets.pdf
